# Supplementary material
Source: Copernicus journal article supplement (doi:10.5194/egusphere-2026-2686)
Supplement: Supplementary file 1 [file egusphere-2026-2686-supplement.pdf]

## Supplementary Figures

## Detrending sensitivity of the stationarity budget (does the sign flip survive trend removal?)

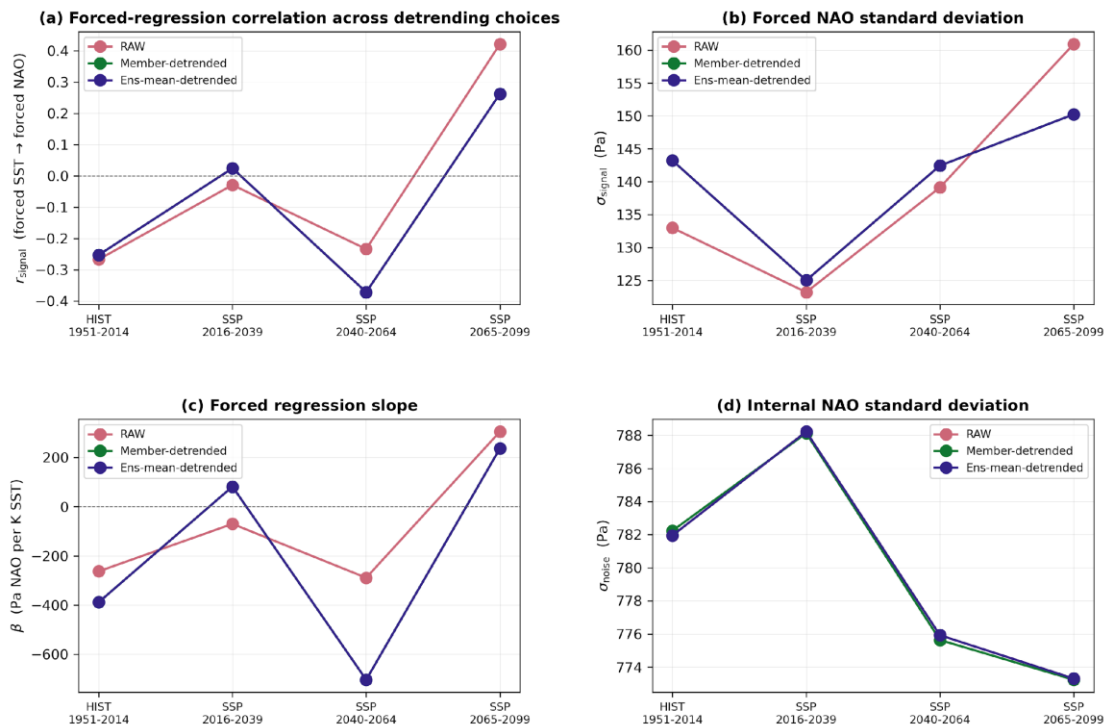

831

832 **Figure S1.** Robustness of the three-term stationarity budget to detrending choice. (a) Forced-regression correlation  
 833  $r_{\text{signal}}$  between forced SST and forced NAO across HIST 1951–2014 and three SSP3-7.0 windows (2016–2039,  
 834 2040–2064, 2065–2099), computed under three detrending protocols: RAW (pink), member-by-member  
 835 detrending (green), and ensemble-mean detrending (blue). (b) Forced NAO standard deviation  $\sigma_{\text{signal}}$  (Pa). (c)  
 836 Forced regression slope  $\beta$  (Pa NAO per K SST). (d) Internal NAO standard deviation  $\sigma_{\text{noise}}$  (Pa). The zero-  
 837 crossing of  $r_{\text{signal}}$  (panel a) and the sign reversal of  $\beta$  between 2040–2064 and 2065–2099 (panel c) appear in all  
 838 three protocols, demonstrating that the late-century forced-response reversal is not an artefact of trend handling.  
 839 The member-detrended and ensemble-mean-detrended estimates overlap to plotting precision in all four panels;  
 840 RAW differs only quantitatively while preserving the same qualitative evolution.

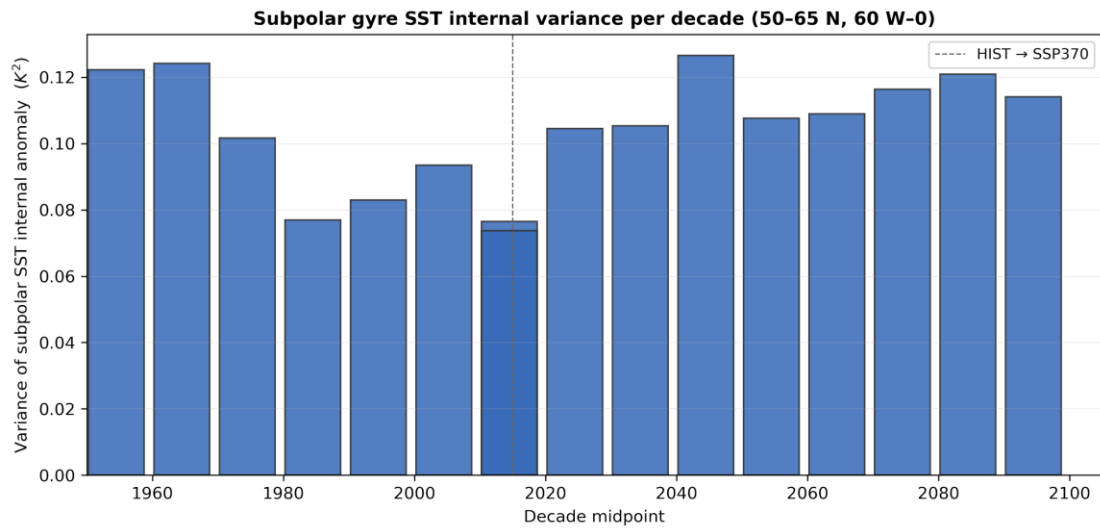

841

842 **Figure S2.** Per-decade variance of internal SST anomaly in the subpolar gyre region (50–65°N, 60°W–0°),  
 843 computed across the 40-member CANARI ensemble after removal of the ensemble mean at each timestep. The  
 844 vertical dashed line marks the HIST → SSP3-7.0 transition (2015). Internal variance fluctuates between  
 845 approximately 0.07 and 0.13 K<sup>2</sup> across the full 1950–2099 record with no systematic forced trend, supporting the  
 846 budget’s noise-stationarity assumption ( $\sigma_{\text{noise}} = 782 \rightarrow 773$  Pa across windows; <2 % change).
